# Supplementary material
Source: PubMed Central journal article supplement (PMC9989338)
Supplement: web_material_kwac035.pdf [file web_material_kwac035.pdf]

## **WEB MATERIAL**

### **Misconceptions About the Direction of Bias From Nondifferential Misclassification**

Jennifer J. Yland, Amelia K. Wesselink, Timothy L. Lash, and Matthew P. Fox

#### **Table of Contents**

|                   |        |
|-------------------|--------|
| Web Figure 1..... | Page 2 |
| Web Table 1.....  | Page 3 |

**Web Figure 1. Density plots of the actualized, disease-specific, exposure sensitivity and specificity from 10,000 simulations.**

We simulated the classified version of exposure by drawing from binomial distributions with probabilities equal to the specified specificity (90%) and sensitivity (60-80%). Each analysis was repeated at three different sample sizes. Panels A, B: Realized sensitivity (A) and specificity (B) for specified 80% and sensitivity 90% specificity; Panels C, D: Realized sensitivity (C) and specificity (D) for specified 70% and sensitivity 90% specificity; Panels E, F: Realized sensitivity (E) and specificity (F) for specified 60% and sensitivity 90% specificity. **NOTE:** The density distribution for simulations with 100 participants appears bumpy due to the discrete nature of binomial sampling.

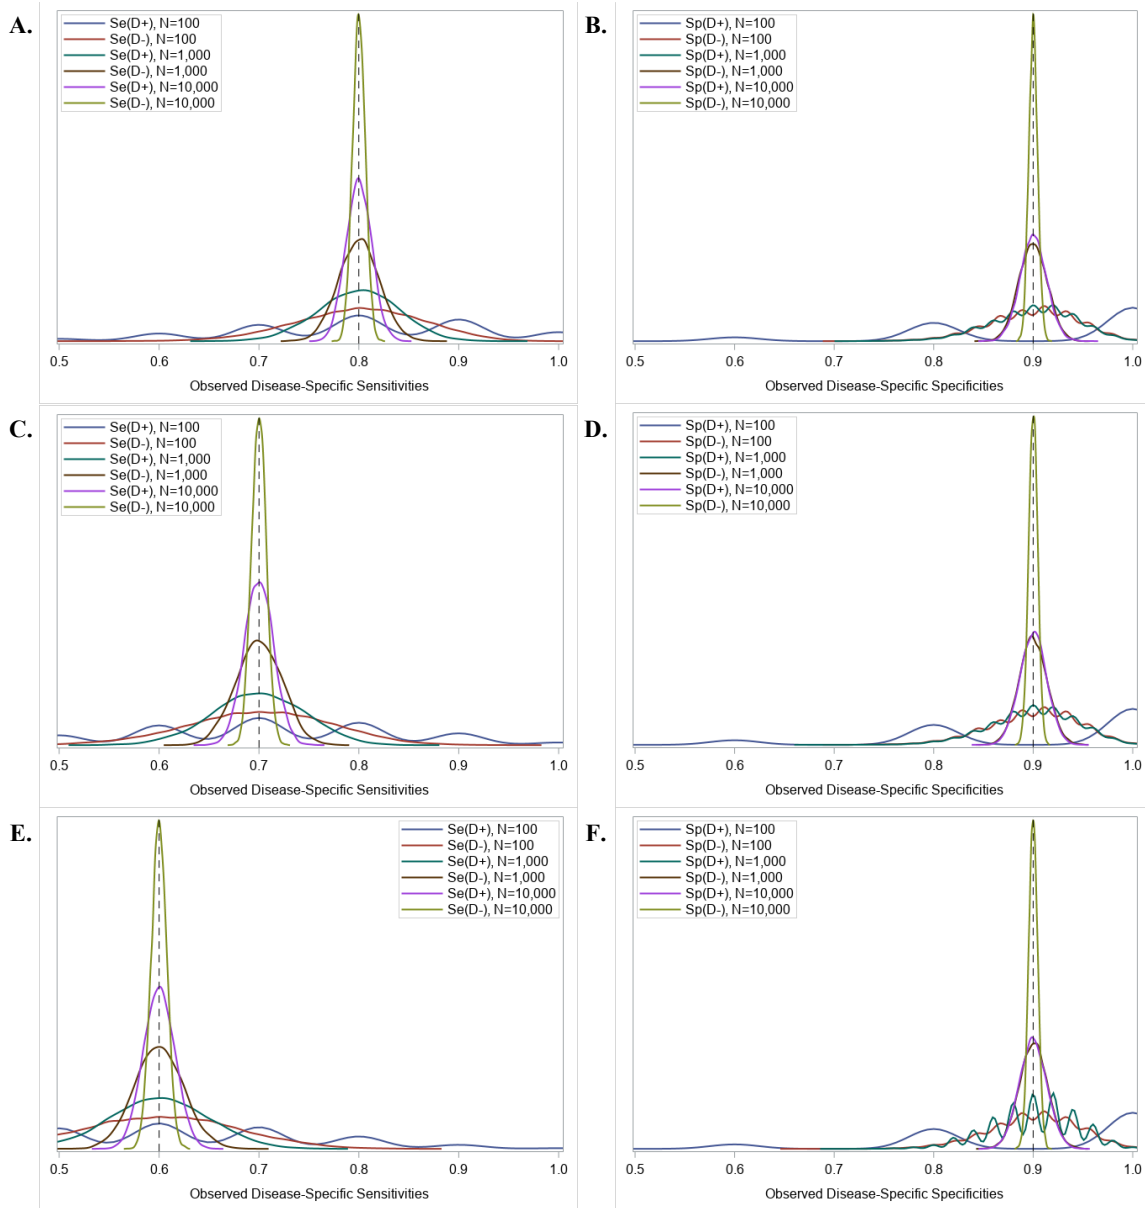

Se(D+): exposure sensitivity in the group with the disease; Se(D-): exposure sensitivity in the group without the disease; Sp(D+): exposure specificity in the group with the disease; Sp(D-): exposure specificity in the group without the disease.

**Web Table 1. Example of non-differential misclassification across non-adjacent categories of a multilevel exposure variable inducing an inverse dose-response relationship in the presence of a true positive dose-response.**

| Exposure Status                                                                                                                  | Outcome Status |       | Total | Risk | Risk Ratio |
|----------------------------------------------------------------------------------------------------------------------------------|----------------|-------|-------|------|------------|
|                                                                                                                                  | D+             | D-    |       |      |            |
| <b>Correctly classified data</b>                                                                                                 |                |       |       |      |            |
| High                                                                                                                             | 100            | 2,900 | 3,000 | 0.03 | 5.33       |
| Low                                                                                                                              | 100            | 5,900 | 6,000 | 0.02 | 2.67       |
| None                                                                                                                             | 30             | 4,770 | 4,800 | 0.01 | ref        |
| <b>60% exposure misclassified across non-adjacent categories in both directions (high to none and none to high) <sup>a</sup></b> |                |       |       |      |            |
| High                                                                                                                             | 58             | 4,022 | 4,080 | 0.01 | 0.73       |
| Low                                                                                                                              | 100            | 5,900 | 6,000 | 0.02 | 0.86       |
| None                                                                                                                             | 72             | 3,648 | 3,720 | 0.02 | 1.00       |

<sup>a</sup> 60% of people with truly high exposure are misclassified as having no exposure, and 60% of people with truly no exposure are misclassified as having high exposure. In this example, there is a true positive dose response, but misclassification creates a spurious inverse dose response.
